# Supplementary material for: Initiation of Opioid Prescription and Risk of Suicidal Behavior Among Youth and Young Adults
Source: Oxford University Press journal article supplement (doi:10.1542/peds.2020-049750), 2022-02-07
Supplement: peds_2020049750supplementarydata.pdf [file peds_2020049750supplementarydata.pdf]

## Supplemental Materials

**SUPPLEMENTAL TABLE 3** Inclusion and Exclusion Criteria, Definitions, and Cohort Derivation

| Criterion                                                  | Definition                                                                                                                                                | Included <i>n</i> |
|------------------------------------------------------------|-----------------------------------------------------------------------------------------------------------------------------------------------------------|-------------------|
| 1. Age 9–29 by January 1, 2013                             | Births between January 1, 1984 and January 1, 2004                                                                                                        | 2 020 962         |
| 2. No prior emigration                                     | Emigration before January 1, 2007 (or 9th birthday if later)                                                                                              | 1 952 961         |
| 3. Alive                                                   | Death before January 1, 2007 (or 9th birthday)                                                                                                            | 1 945 206         |
| 4. Residing in Sweden                                      | Nonmissing neighborhood of residence in 2007 (or year of 9th birthday)                                                                                    | 1 941 632         |
| 5. Biological parents, identifiable                        | father No adoptive parents, nonmissing paternal identifier                                                                                                | 1 929 139         |
| 6. No prior opioids                                        | No opioid <sup>a</sup> dispensed before January 1, 2007 (or 9th birthday)                                                                                 | 1 895 987         |
| 7. No invalid opioid prescription data                     | No invalid N02A or N07BC anatomical therapeutic chemical code before December 31, 2013                                                                    | 1 895 984         |
| Demographically matched comparison (singleton births only) |                                                                                                                                                           |                   |
| 8. Singleton birth                                         | Nontwin or greater multiple                                                                                                                               | 1 846 548         |
| 9. Opioid recipient                                        | Dispensed opioid after January 1, 2007 (or 9th birthday)                                                                                                  | 197 107           |
| 10. Matching                                               | Matched 1:1 on demographics to non-recipient                                                                                                              | 197 107           |
| 11. Valid follow-up                                        | Index date precedes censoring date (for both initiator and matched noninitiator)                                                                          | 193 216           |
| 12. No preexisting suicidal behavior                       | No outcome on or before index date (recipient and non-recipient)                                                                                          | 180 808           |
| Active comparator design (singleton births only)           |                                                                                                                                                           |                   |
| 13. Incident opioid or NSAID user                          | First dispensed either drug after January 1, 2007 (or 9th birthday)                                                                                       | 424 288           |
| 14. No simultaneous prescription                           | Index date is not identical for opioid and NSAID                                                                                                          | 397 613           |
| 15. Valid follow-up                                        | Index date precedes censoring date                                                                                                                        | 395 724           |
| 16. No preexisting suicidal behavior                       | No outcome on or before index date                                                                                                                        | 383 488           |
| 17. Complete case                                          | Nonmissing covariate values                                                                                                                               | 341 731           |
| Sibling comparison design                                  |                                                                                                                                                           |                   |
| 18. Differentially opioid exposed                          | At least one sibling dispensed opioid after January 1, 2007 (or 9th birthday), but not simultaneously within family (1 family per each mother and father) | 301 523           |
| 19. Valid follow-up                                        | Index date precedes censoring date (in differentially exposed siblings)                                                                                   | 298 015           |
| 20. No preexisting suicidal behavior                       | No outcome on or before index date (in differentially exposed siblings)                                                                                   | 280 777           |
| 21. Complete case                                          | Nonmissing covariate values (in differentially exposed siblings)                                                                                          | 229 952           |

NSAID, nonsteroidal antiinflammatory drug.

<sup>a</sup> Opioid analgesic or buprenorphine or methadone treatment for opioid use disorder.

**SUPPLEMENTAL TABLE 4** Anatomical Therapeutic Chemical Codes for Included Medications

| Medication Group                    | Anatomical Therapeutic Chemical Codes                                                                                                                                                                                               |
|-------------------------------------|-------------------------------------------------------------------------------------------------------------------------------------------------------------------------------------------------------------------------------------|
| Antidepressant (SSRI)               | SSRI (N06AB): N06AB03, N06AB04, N06AB05, N06AB06, N06AB08, N06AB10                                                                                                                                                                  |
| Antidepressant (cyclic)             | N06AA: N06AA02, N06AA04, N06AA06, N06AA09, N06AA10, N06AA21                                                                                                                                                                         |
| Antidepressant (other)              | From other N06A: N06AF03, N06AF04, N06AG02, N06AX02, N06AX03, N06AX11, N06AX12, N06AX16, N06AX18, N06AX22                                                                                                                           |
| Antiepileptic/ mood stabilizer      | Lithium: N05AN01; from N03A: N03AA02, N03AA03, N03AB02, N03AB05, N03AD01, N03AF01, N03AF02, N03AF03, N03AF04, N03AG01, N03AG04, N03AX03, N03AX09, N03AX10, N03AX11, N03AX14, N03AX15, N03AX17, N03AX18, N03AX21, N03AX22            |
| Antipsychotic                       | From N05A: N05AA01, N05AA02, N05AB01, N05AB02, N05AB03, N05AB04, N05AC02, N05AD01, N05AD03, N05AE03, N05AE04, N05AF01, N05AF03, N05AF05, N05AG02, N05AH02, N05AH03, N05AH04, N05AL01, N05AL05, N05AX08, N05AX12, N05AX13            |
| Anxiolytic                          | From N05B: N05BB01, N05BE01                                                                                                                                                                                                         |
| ADHD medication                     | N06BA: N06BA01, N06BA02, N06BA04, N06BA07, N06BA09, N06BA12                                                                                                                                                                         |
| Benzodiazepine                      | N05BA: N05BA01, N05BA04, N05BA06, N05BA09, N05BA12; N05CD: N05CD02, N05CD03, N05CD05, N05CD08; Clonazepam: N03AE01                                                                                                                  |
| Duloxetine                          | N06AX21                                                                                                                                                                                                                             |
| Gabapentin/pregabalin               | N03AX12, N03AX16                                                                                                                                                                                                                    |
| Migraine medication                 | N02C: N02CA01, N02CA52, N02CA72, N02CC01, N02CC02, N02CC03, N02CC04, N02CC05, N02CC06, N02CX01, N02CX02                                                                                                                             |
| Nonsteroidal anti inflammatory drug | M01A: M01AB01, M01AB02, M01AB05, M01AB15, M01AB16, M01AB55, M01AC01, M01AC02, M01AC05, M01AC06, M01AE01, M01AE02, M01AE03, M01AE14, M01AE52, M01AH01, M01AH05, M01AX01, M01AX05                                                     |
| Opioid analgesic <sup>a</sup>       | N02A: N02AA01, N02AA03, N02AA05, N02AA55, N02AA59, N02AB01, N02AB02, N02AB03, N02AC04, N02AC54, N02AD01, N02AE01, N02AG01, N02AG02, N02AG04, N02AX02, N02AX06; N07BC: N07BC01, N07BC02, N07BC51; other codeine combination: N02BE51 |
| Paracetamol                         | N02BE01                                                                                                                                                                                                                             |
| Z-hypnotic                          | N05CF: N05CF01, N05CF02, N05CF03                                                                                                                                                                                                    |
| Other sedative/hypnotic             | From N05C: N05CC01, N05CH01, N05CM02, N05CM05, N05CM06, N05CM09                                                                                                                                                                     |

<sup>a</sup> See text for references for method of distinguishing opioid analgesics from opioid use disorder medications.

**SUPPLEMENTAL TABLE 5** International Classification of Diseases (ICD) Codes for Included Diagnoses

| Diagnosis Group <sup>a</sup>             | ICD-10                         | ICD-9                                          | ICD-8                    |
|------------------------------------------|--------------------------------|------------------------------------------------|--------------------------|
| Anxiety disorder                         | F40-F43                        | 300A, 300C, 300D, 308, 309                     | 300.0, 300.2, 300.3, 307 |
| Attention-deficit/hyperactivity disorder | F90                            | 314                                            | —                        |
| Bipolar disorder                         | F30, F31                       | 296A, 296C, 296D, 296E, 296W                   | 296.1, 296.3, 296.8      |
| Cancer as cause of death only            | C00-C97, D37-D48               | —                                              | —                        |
| Depressive disorder                      | F32, F33, F34.1                | 296B, 300E, 311                                | 296.2, 300.4             |
| Substance use disorder                   | F10-F19 (except F17; tobacco)  | 291, 292, 303, 304, 305 (except 305B; tobacco) | 291, 303, 304            |
| Schizophrenia spectrum disorder          | F20-F25, F28, F29              | 295, 297, 298                                  | 295, 297, 298, 299       |
| Suicidal behavior <sup>b</sup>           | X60-X84, Y10-Y34, Y87.0, Y87.2 | E950-E959, E980-E989                           | E950-E959, E980-E989     |

—, not applicable.

<sup>a</sup> In order to reduce the likelihood of inappropriate or invalid diagnoses, we required individuals to be at least 12 years of age at the time of diagnosis of substance use disorder and bipolar disorder, and 5 years of age for attention-deficit/hyperactivity disorder, anxiety disorder, and depressive disorder.

<sup>b</sup> Secondary ICD-10 suicidal behavior outcomes were: overdose outcomes (X60-X65, Y10-Y15), outcomes excluding overdose and other self-poisoning (X60-X69, Y10-Y19), and outcomes excluding injuries of undetermined intent (Y10-Y34, Y87.2).

**SUPPLEMENTAL TABLE 6** Distribution of Covariates for Active Comparator Design

| Variable                                            | Opioid Initiators | NSAID Initiators |
|-----------------------------------------------------|-------------------|------------------|
| Overall                                             |                   |                  |
| Included, <i>n</i> (%)                              | 86 635 (100)      | 255 096 (100)    |
| Subsequent suicidal behavior, <i>n</i> (%)          | 1146 (1.3)        | 3128 (1.2)       |
| Follow-up duration, y, median (IQR)                 | 2.3 (1.0–4.1)     | 2.9 (1.3–4.8)    |
| Demographics, <i>n</i> (%)                          |                   |                  |
| Female                                              | 41 567 (48.0)     | 142 250 (55.8)   |
| County of residence at start of eligibility         |                   |                  |
| Skåne                                               | 11 896 (13.7)     | 28 470 (11.2)    |
| Stockholm                                           | 20 475 (23.6)     | 45 327 (17.8)    |
| Västra Götaland                                     | 11 600 (13.4)     | 49 646 (19.5)    |
| Other counties                                      | 42 664 (49.2)     | 131 653 (51.6)   |
| Age at initiation, y, median (IQR)                  | 20.2 (17.1–23.0)  | 19.3 (16.3–22.5) |
| Psychiatric diagnoses, <i>n</i> (%)                 |                   |                  |
| Attention-deficit/hyperactivity disorder            | 2068 (2.4)        | 4873 (1.9)       |
| Anxiety disorder                                    | 3696 (4.3)        | 8872 (3.5)       |
| Bipolar disorder                                    | 256 (0.3)         | 566 (0.2)        |
| Depressive disorder                                 | 2651 (3.1)        | 6474 (2.5)       |
| Schizophrenia spectrum disorder                     | 187 (0.2)         | 399 (0.2)        |
| Substance use disorder                              | 3345 (3.9)        | 6001 (2.4)       |
| Psychoactive pharmacotherapies, <i>n</i> (%)        |                   |                  |
| Antidepressant, other                               | 1770 (2.0)        | 3649 (1.4)       |
| Antidepressant, SSRI                                | 5588 (6.5)        | 13 130 (5.1)     |
| Antidepressant, cyclic                              | 363 (0.4)         | 721 (0.3)        |
| Antiepileptic/mood stabilizer                       | 1236 (1.4)        | 2669 (1.0)       |
| Antipsychotic                                       | 934 (1.1)         | 2048 (0.8)       |
| Anxiolytic                                          | 4352 (5.0)        | 10 347 (4.1)     |
| Attention-deficit/hyperactivity disorder medication | 1944 (2.2)        | 4552 (1.8)       |
| Benzodiazepine                                      | 2187 (2.5)        | 3982 (1.6)       |
| Duloxetine                                          | 216 (0.2)         | 453 (0.2)        |
| Gabapentin/pregabalin                               | 330 (0.4)         | 599 (0.2)        |
| Migraine medication                                 | 1233 (1.4)        | 3886 (1.5)       |
| Paracetamol                                         | 3518 (4.1)        | 8287 (3.2)       |
| Z-hypnotic                                          | 2579 (3.0)        | 5041 (2.0)       |
| Other sedative/hypnotic                             | 2783 (3.2)        | 5972 (2.3)       |
| Maternal pregnancy-related factors, <i>n</i> (%)    |                   |                  |
| Birth order                                         |                   |                  |
| First                                               | 35 409 (40.9)     | 104 021 (40.8)   |
| Second                                              | 31 546 (36.4)     | 92 711 (36.4)    |
| Third                                               | 13 688 (15.8)     | 41 051 (16.1)    |
| Fourth or higher                                    | 5992 (6.9)        | 17 313 (6.8)     |
| Maternal smoking during pregnancy                   |                   |                  |
| None                                                | 62 950 (72.7)     | 191 115 (74.9)   |
| Moderate                                            | 14 474 (16.7)     | 39 700 (15.6)    |
| High                                                | 9211 (10.6)       | 24 281 (9.5)     |
| Year of birth, median (IQR)                         | 1990 (1987–1993)  | 1990 (1987–1994) |
| Maternal characteristics, <i>n</i> (%)              |                   |                  |
| Nordic country of origin                            | 79 996 (92.3)     | 232 978 (91.3)   |
| Age at childbirth, y                                |                   |                  |
| Less than 20                                        | 1745 (2.0)        | 4594 (1.8)       |
| 20–29                                               | 50 355 (58.1)     | 146 984 (57.6)   |
| 30–39                                               | 32 619 (37.7)     | 97 632 (38.3)    |
| At least 40                                         | 1916 (2.2)        | 5886 (2.3)       |
| Highest level of education                          |                   |                  |
| Less than 9 y                                       | 1589 (1.8)        | 5079 (2.0)       |
| 9 y                                                 | 8950 (10.3)       | 24 812 (9.7)     |
| Any upper secondary                                 | 45 709 (52.8)     | 136 788 (53.6)   |
| Less than 2 y postsecondary                         | 3428 (4.0)        | 10 427 (4.1)     |
| At least 2 y postsecondary                          | 26 439 (30.5)     | 76 599 (30.0)    |
| Postgraduate                                        | 511 (0.6)         | 1391 (0.5)       |
| Opioid receipt, 1.5 y before initiation             | 13 850 (16.0)     | 37 406 (14.7)    |

**SUPPLEMENTAL TABLE 6** Continued

| Variable                                  | Opioid Initiators | NSAID Initiators |
|-------------------------------------------|-------------------|------------------|
| Psychiatric hospitalization               |                   |                  |
| Bipolar disorder                          | 424 (0.5)         | 1098 (0.4)       |
| Schizophrenia spectrum disorder           | 656 (0.8)         | 1817 (0.7)       |
| Substance use disorder                    | 2278 (2.6)        | 5451 (2.1)       |
| Suicidal behavior                         | 3072 (3.5)        | 7922 (3.1)       |
| Anxiety disorder                          | 3068 (3.5)        | 7981 (3.1)       |
| Depressive disorder                       | 2531 (2.9)        | 6830 (2.7)       |
| Substance-related crime conviction        | 1935 (2.2)        | 4644 (1.8)       |
| Violent crime conviction                  | 1299 (1.5)        | 3207 (1.3)       |
| Paternal characteristics, <i>n</i> (%)    |                   |                  |
| Nordic country of origin                  | 78 676 (90.8)     | 229 801 (90.1)   |
| Age at childbirth, y                      |                   |                  |
| Less than 20                              | 385 (0.4)         | 1047 (0.4)       |
| 20–29                                     | 35 601 (41.1)     | 102 215 (40.1)   |
| 30–39                                     | 42 588 (49.2)     | 126 965 (49.8)   |
| 40–49                                     | 7444 (8.6)        | 22 960 (9.0)     |
| At least 50                               | 617 (0.7)         | 1909 (0.7)       |
| Highest level of education                |                   |                  |
| Less than 9 y                             | 3301 (3.8)        | 10 054 (3.9)     |
| 9 y                                       | 13 946 (16.1)     | 39 704 (15.6)    |
| Any upper secondary                       | 46 295 (53.4)     | 137 599 (53.9)   |
| Less than 2 y postsecondary               | 6221 (7.2)        | 19 097 (7.5)     |
| At least 2 y postsecondary                | 15 816 (18.3)     | 45 623 (17.9)    |
| Postgraduate                              | 1056 (1.2)        | 3019 (1.2)       |
| Opioid receipt, 1.5 y before initiation   | 10 988 (12.7)     | 29 836 (11.7)    |
| Psychiatric hospitalization               |                   |                  |
| Bipolar disorder                          | 280 (0.3)         | 807 (0.3)        |
| Schizophrenia spectrum disorder           | 570 (0.7)         | 1608 (0.6)       |
| Substance use disorder                    | 4286 (4.9)        | 10 660 (4.2)     |
| Suicidal behavior                         | 2467 (2.8)        | 6552 (2.6)       |
| Anxiety disorder                          | 2212 (2.6)        | 6155 (2.4)       |
| Depressive disorder                       | 1903 (2.2)        | 5194 (2.0)       |
| Substance-related crime conviction        | 11 640 (13.4)     | 29 893 (11.7)    |
| Violent crime conviction                  | 9668 (11.2)       | 25 276 (9.9)     |
| Other socioeconomic factors, <i>n</i> (%) |                   |                  |
| Parents not cohabitating at birth         | 4692 (5.4)        | 12 824 (5.0)     |
| Family income in childhood                |                   |                  |
| Lowest income decile                      | 9028 (10.4)       | 24 903 (9.8)     |
| Decile 2                                  | 8706 (10.0)       | 25 373 (9.9)     |
| Decile 3                                  | 8743 (10.1)       | 25 332 (9.9)     |
| Decile 4                                  | 8438 (9.7)        | 25 845 (10.1)    |
| Decile 5                                  | 8332 (9.6)        | 25 985 (10.2)    |
| Decile 6                                  | 8314 (9.6)        | 25 938 (10.2)    |
| Decile 7                                  | 8372 (9.7)        | 25 851 (10.1)    |
| Decile 8                                  | 8640 (10.0)       | 25 654 (10.1)    |
| Decile 9                                  | 8748 (10.1)       | 25 474 (10.0)    |
| Highest income decile                     | 9314 (10.8)       | 24 741 (9.7)     |
| Neighborhood deprivation in childhood     |                   |                  |
| Least deprived decile                     | 9401 (10.9)       | 24 664 (9.7)     |
| Decile 2                                  | 8754 (10.1)       | 25 343 (9.9)     |
| Decile 3                                  | 8382 (9.7)        | 25 818 (10.1)    |
| Decile 4                                  | 8636 (10.0)       | 25 639 (10.1)    |
| Decile 5                                  | 8451 (9.8)        | 25 743 (10.1)    |
| Decile 6                                  | 8648 (10.0)       | 25 630 (10.0)    |
| Decile 7                                  | 8566 (9.9)        | 25 680 (10.1)    |
| Decile 8                                  | 8548 (9.9)        | 25 727 (10.1)    |
| Decile 9                                  | 8630 (10.0)       | 25 452 (10.0)    |
| Most deprived decile                      | 8619 (9.9)        | 25 400 (10.0)    |

Unless otherwise noted, all variables assessed prior to date of initiation. Age and year of birth were centered at 9 years of age and year 2007, respectively, and modeled with linear and quadratic terms.

**SUPPLEMENTAL TABLE 7** Opioid Prescriptions Dispensed to Birth Cohort (*N* = 201 433 Initiators) at Initiation

| Opioid Drug                       | Anatomical Therapeutic Chemical Code | <i>n</i> | %     |
|-----------------------------------|--------------------------------------|----------|-------|
| Buprenorphine                     | N02AE01                              | 145      | < 0.1 |
|                                   | N07BC01                              | 15       | < 0.1 |
| With naloxone                     | N07BC51                              | 14       | < 0.1 |
| Codeine combinations <sup>a</sup> | N02AA59                              | 112 810  | 56.0  |
| Paracetamol with codeine          | N02BE51                              | 2669     | 1.3   |
| Dextropropoxyphene                | N02AC04                              | 8894     | 4.4   |
| Fentanyl                          | N02AB03                              | 37       | <0.1  |
| Hydromorphone                     | N02AA03                              | <10      | <0.1  |
| Ketobemidone                      | N02AB01                              | 649      | 0.3   |
| With antispasmodics               | N02AG02                              | 76       | <0.1  |
| Methadone                         | N07BC02                              | <10      | <0.1  |
| Morphine                          | N02AA01                              | 3241     | 1.6   |
| With antispasmodics               | N02AG01                              | 3804     | 1.9   |
| Oxycodone                         | N02AA05                              | 16 389   | 8.1   |
| With naloxone                     | N02AA55                              | 358      | 0.2   |
| Tapentadol                        | N02AX06                              | <10      | <0.1  |
| Tramadol                          | N02AX02                              | 49 998   | 24.8  |
| >1 drug                           | —                                    | 2314     | 1.1   |
| Total                             | —                                    | 201 433  | 100.0 |

Ns of size less than 10 masked. —, not applicable.

<sup>a</sup> Acetylsalicylic acid, ibuprofen, or paracetamol.

**SUPPLEMENTAL TABLE 8** Weighted Covariate Balance for Active Comparator Design

| Variable                                            | Opioid Initiators | NSAID Initiators  |
|-----------------------------------------------------|-------------------|-------------------|
| Overall                                             |                   |                   |
| Weighted <i>N</i> (%)                               | 86 061.2 (100.0)  | 255 114.8 (100.0) |
| Subsequent suicidal behavior                        | 1.3               | 1.2               |
| Follow-up duration, y, median (IQR)                 | 2.4 (1.0–4.3)     | 2.9 (1.3–4.8)     |
| Demographics                                        |                   |                   |
| Female                                              | 53.1              | 53.8              |
| County of residence at start of eligibility         |                   |                   |
| Skåne                                               | 11.9              | 11.8              |
| Stockholm                                           | 19.3              | 19.2              |
| Västra Götaland                                     | 17.3              | 17.9              |
| Other counties                                      | 51.4              | 51.0              |
| Age at initiation, y, median (IQR)                  | 19.7 (16.6–22.7)  | 19.5 (16.5–22.6)  |
| Psychiatric Diagnoses                               |                   |                   |
| Attention-deficit/hyperactivity disorder            | 2.1               | 2.0               |
| Anxiety disorder                                    | 3.8               | 3.7               |
| Bipolar disorder                                    | 0.3               | 0.2               |
| Depressive disorder                                 | 2.8               | 2.7               |
| Schizophrenia spectrum disorder                     | 0.2               | 0.2               |
| Substance use disorder                              | 2.9               | 2.7               |
| Psychoactive Pharmacotherapies                      |                   |                   |
| Antidepressant (other)                              | 1.7               | 1.6               |
| Antidepressant (SSRI)                               | 5.6               | 5.5               |
| Antidepressant (cyclic)                             | 0.3               | 0.3               |
| Antiepileptic/mood stabilizer                       | 1.2               | 1.1               |
| Antipsychotic                                       | 0.9               | 0.9               |
| Anxiolytic                                          | 4.4               | 4.3               |
| Attention-deficit/hyperactivity disorder medication | 2.0               | 1.9               |
| Benzodiazepine                                      | 1.9               | 1.8               |
| Duloxetine                                          | 0.2               | 0.2               |
| Gabapentin/pregabalin                               | 0.3               | 0.3               |
| Migraine medication                                 | 1.5               | 1.5               |
| Paracetamol                                         | 3.5               | 3.5               |
| Z-hypnotic                                          | 2.4               | 2.2               |
| Other sedative/hypnotic                             | 2.7               | 2.6               |
| Maternal Pregnancy-Related Factors                  |                   |                   |
| Birth order                                         |                   |                   |
| First                                               | 40.8              | 40.8              |
| Second                                              | 36.4              | 36.4              |
| Third                                               | 16.0              | 16.0              |
| Fourth or higher                                    | 6.8               | 6.8               |
| Maternal smoking during pregnancy                   |                   |                   |
| None                                                | 74.2              | 74.3              |
| Moderate                                            | 16.0              | 15.9              |
| High                                                | 9.9               | 9.8               |
| Year of birth, median (IQR)                         | 1990 (1987–1993)  | 1990 (1987–1994)  |
| Maternal Characteristics                            |                   |                   |
| Nordic country of origin                            | 91.8              | 91.6              |
| Age at childbirth, y                                |                   |                   |
| Less than 20                                        | 1.9               | 1.9               |
| 20–29                                               | 57.8              | 57.7              |
| 30–39                                               | 38.1              | 38.1              |
| At least 40                                         | 2.3               | 2.3               |
| Highest level of education                          |                   |                   |
| Less than 9 y                                       | 1.9               | 2.0               |
| 9 y                                                 | 9.9               | 9.9               |
| Any upper secondary                                 | 53.3              | 53.4              |
| Less than 2 y post-secondary                        | 4.0               | 4.1               |
| At least 2 y post-secondary                         | 30.3              | 30.2              |
| Postgraduate                                        | 0.6               | 0.6               |
| Opioid receipt, 1.5 y before initiation             | 15.1              | 15.0              |

**SUPPLEMENTAL TABLE 8** Continued

| Variable                                | Opioid Initiators | NSAID Initiators |
|-----------------------------------------|-------------------|------------------|
| Psychiatric hospitalization             |                   |                  |
| Bipolar disorder                        | 0.4               | 0.4              |
| Schizophrenia spectrum disorder         | 0.7               | 0.7              |
| Substance use disorder                  | 2.3               | 2.3              |
| Suicidal behavior                       | 3.3               | 3.2              |
| Anxiety disorder                        | 3.3               | 3.2              |
| Depressive disorder                     | 2.8               | 2.7              |
| Substance-related crime conviction      | 1.9               | 1.9              |
| Violent crime conviction                | 1.3               | 1.3              |
| Paternal Characteristics                |                   |                  |
| Nordic country of origin                | 90.5              | 90.3             |
| Age at childbirth, y                    |                   |                  |
| Less than 20                            | 0.4               | 0.4              |
| 20–29                                   | 40.4              | 40.3             |
| 30–39                                   | 49.6              | 49.6             |
| 40–49                                   | 8.9               | 8.9              |
| At least 50                             | 0.7               | 0.7              |
| Highest level of education              |                   |                  |
| Less than 9 y                           | 3.9               | 3.9              |
| 9 y                                     | 15.7              | 15.7             |
| Any upper secondary                     | 53.8              | 53.8             |
| Less than 2 y postsecondary             | 7.4               | 7.4              |
| At least 2 y postsecondary              | 18.0              | 18.0             |
| Postgraduate                            | 1.2               | 1.2              |
| Opioid receipt, 1.5 y before initiation | 12.0              | 11.9             |
| Psychiatric hospitalization             |                   |                  |
| Bipolar disorder                        | 0.3               | 0.3              |
| Schizophrenia spectrum disorder         | 0.6               | 0.6              |
| Substance use disorder                  | 4.4               | 4.4              |
| Suicidal behavior                       | 2.6               | 2.6              |
| Anxiety disorder                        | 2.5               | 2.5              |
| Depressive disorder                     | 2.1               | 2.1              |
| Substance-related crime conviction      | 12.2              | 12.2             |
| Violent crime conviction                | 10.3              | 10.2             |
| Other Socioeconomic Factors             |                   |                  |
| Parents not cohabitating at birth       | 5.1               | 5.1              |
| Family income in childhood              |                   |                  |
| Lowest income decile                    | 10.0              | 9.9              |
| Decile 2                                | 9.9               | 10.0             |
| Decile 3                                | 10.0              | 10.0             |
| Decile 4                                | 10.0              | 10.0             |
| Decile 5                                | 10.0              | 10.0             |
| Decile 6                                | 10.0              | 10.0             |
| Decile 7                                | 10.0              | 10.0             |
| Decile 8                                | 10.1              | 10.0             |
| Decile 9                                | 10.0              | 10.0             |
| Highest income decile                   | 10.0              | 10.0             |
| Neighborhood deprivation in childhood   |                   |                  |
| Least deprived decile                   | 10.0              | 10.0             |
| Decile 2                                | 10.0              | 10.0             |
| Decile 3                                | 10.0              | 10.0             |
| Decile 4                                | 10.1              | 10.0             |
| Decile 5                                | 10.0              | 10.0             |
| Decile 6                                | 10.1              | 10.0             |
| Decile 7                                | 10.0              | 10.0             |
| Decile 8                                | 10.0              | 10.0             |
| Decile 9                                | 10.0              | 10.0             |
| Most deprived decile                    | 9.8               | 9.9              |

Values are percent (%) unless otherwise indicated. Unless otherwise noted, all variables assessed prior to date of initiation.

**SUPPLEMENTAL TABLE 9** Results of Sensitivity Analyses

| Model                                          | <i>N</i> , Individuals | <i>N</i> With Outcome | Hazard Ratio (95% CI) |
|------------------------------------------------|------------------------|-----------------------|-----------------------|
| Adjusted model from main analysis              | 341 731                | 4274                  | 1.19 (1.11–1.28)      |
| Opioid drug, strength, and formulation         |                        |                       |                       |
| Immediate-release, weak                        | 329 633                | 4128                  | 1.18 (1.10–1.27)      |
| Extended-release or long-acting, strong        | 260 953                | 3193                  | 1.25 (0.98–1.61)      |
| Any, strong                                    | 265 333                | 3234                  | 1.24 (1.02–1.52)      |
| Excluding buprenorphine/methadone              | 341 671                | 4274                  | 1.19 (1.11–1.28)      |
| Age at initiation                              |                        |                       |                       |
| Youth and adolescents (age <19 y)              | 155 314                | 2419                  | 1.16 (1.05–1.28)      |
| Young adults (age 19 y or older)               | 186 417                | 1855                  | 1.30 (1.18–1.44)      |
| Active comparator specifications               |                        |                       |                       |
| Covariates rather than weights                 | 341 731                | 4274                  | 1.22 (1.14–1.30)      |
| Nontruncated, stabilized weights               | 341 731                | 4274                  | 1.19 (1.10–1.27)      |
| Nontruncated, non-stabilized weights           | 341 731                | 4274                  | 1.18 (1.10–1.27)      |
| Unadjusted models                              |                        |                       |                       |
| Complete case only                             | 341 731                | 4274                  | 1.25 (1.17–1.34)      |
| Including those with missingness on covariates | 383 488                | 4859                  | 1.23 (1.16–1.31)      |
| Dental initiation                              | 18 603                 | 180                   | 1.56 (1.13–2.14)      |
| Without cancer                                 | 339 846                | 4246                  | 1.18 (1.10–1.27)      |
| Depressive disorder outcome                    | 332 606                | 8410                  | 0.99 (0.94–1.04)      |

**SUPPLEMENTAL TABLE 10** Descriptive Statistics for the Sibling Comparison Design

| Variable                                    | Opioid Initiators   | Noninitiator Siblings |
|---------------------------------------------|---------------------|-----------------------|
| Included, <i>n</i>                          | 97 366              | 132 586               |
| Subsequent suicidal behavior, <i>n</i> (%)  | 1696 (1.7)          | 1117 (0.8)            |
| Female, <i>n</i> (%)                        | 51 641 (53.0)       | 62 681 (47.4)         |
| Age at initiation, <i>y</i> , median (IQR)  | 19.96 (17.27–22.68) | 19.14 (15.62–22.29)   |
| Follow-up duration, <i>y</i> , median (IQR) | 3.07 (1.55–4.82)    | 2.85 (1.36–4.61)      |

Initiation is date of first opioid prescription receipt or corresponding date for noninitiator siblings. For the sibling comparison design, families must vary on the suicidal behavior outcome to contribute to the stratified Cox regression (informative *N* = 6451 individuals in 2617 families). Within-family covariates were maternal and paternal age at childbearing, neighborhood deprivation, family income, parental cohabitation, maternal smoking during pregnancy, birth order, county of residence, sex, linear and quadratic age and year of birth, substance use disorder, schizophrenia, bipolar disorder, anxiety disorder, attention-deficit/hyperactivity disorder, depressive disorder, and psychoactive medications.
